# Supplementary material for: Cathepsin B defines leader cells during the collective invasion of salivary adenoid cystic carcinoma
Source: PubMed Central journal article supplement — Int J Oncol. 2019 Feb 22;54(4):1233–44. doi: 10.3892/ijo.2019.4722 (PMC6411368; doi:10.3892/ijo.2019.4722), 2019-02-22

Figure S1. CTSB knockdown in SACC-38 cells. (A) RT-qPCR and (B) western blot analysis demonstrated that three siRNA duplexes for CTSB efficiently knocked down their target and that siCTS B-3 had the highest efficiency. Data are presented as the means  $\pm$  standard deviation. \* $P < 0.05$ . CTSB, cathepsin B; SACC, salivary adenoid cystic carcinoma; RT-qPCR, reverse transcription-quantitative polymerase chain reaction.

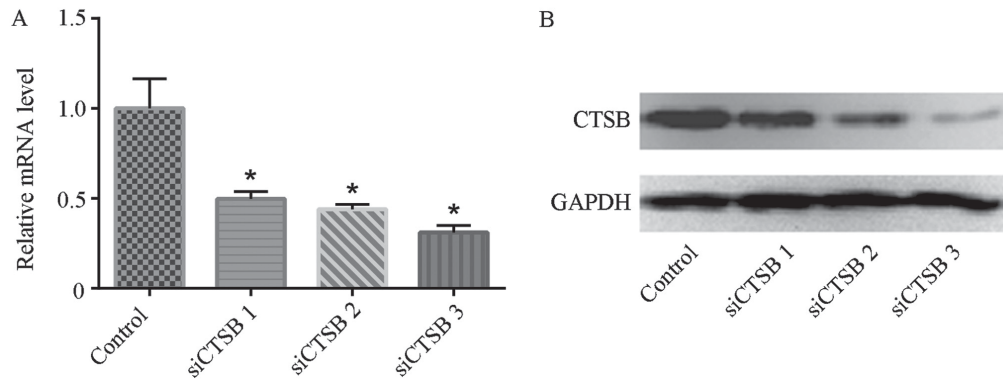

Supplement: Supplementary_Data.pdf [file Supplementary_Data.pdf]
